# Supplementary material for: Phenopyrrolizins A and B, Two Novel Pyrrolizine Alkaloids from Marine-Derived Actinomycetes Micromonospora sp. HU138
Source: MDPI journal article supplement (doi:10.3390/molecules28227672), 2023-11-20
Supplement: s1 [file s1]

**Phenopyrrolizins A and B, two novel pyrrolizine alkaloids from marine-derived actinomycetes *Micromonospora* sp. HU138**

**Hui Zhang<sup>1,2,3</sup>, Xiaohan Ren<sup>1</sup>, Haiju Xu<sup>2</sup>, Huan Qi<sup>1</sup>, Shihua Du<sup>3</sup>, Jun Huang<sup>1,4</sup>, Ji Zhang<sup>3,\*</sup> and Jidong Wang<sup>1,\*</sup>**

<sup>1</sup> Key Laboratory of Vector Biology and Pathogen Control of Zhejiang Province, College of Life Science, Huzhou University, Huzhou 313000, China; zhanghui\_6363@163.com (H.Z.); 17729780165@163.com (X.R.); lcqhlc@163.com (H.Q.); huangj@makohs.com (J.H.)

<sup>2</sup> Key Laboratory of Horticultural Biotechnology of Taizhou, School of Agriculture and Bioengineering, Taizhou Vocational College of Science and Technology, Taizhou 318020, China; haijuxu@21cn.com

<sup>3</sup> College of Plant Protection, Northeast Agricultural University, Harbin 150030, China; dushihua12333@163.com

<sup>4</sup> Zhejiang Makohs Biotech Co., Ltd., Taizhou 318000, China

\* Correspondence: zhangji@neau.edu.cn (J.Z.); 02752@zjhu.edu.cn (J.W.); Tel./Fax: +86-451-55190413 (J.Z.); +86-572-2321016 (J.W.)

## Contents

|                                                                                                                                                                                               |    |
|-----------------------------------------------------------------------------------------------------------------------------------------------------------------------------------------------|----|
| Figure S1. The maximum-parsimony tree shown the phylogenetic relationships between strain HU138 and related species of the genus <i>Micromonospora</i> based on 16S rRNA gene sequences.....  | 3  |
| Figure S2. The maximum-likelihood tree shown the phylogenetic relationships between strain HU138 and related species of the genus <i>Micromonospora</i> based on 16S rRNA gene sequences..... | 3  |
| Figure S3. The HRESI-MS spectrum of compound <b>1</b> . ....                                                                                                                                  | 4  |
| Figure S4. The <sup>1</sup> H NMR (400 MHz, DMSO- <i>d</i> <sub>6</sub> ) spectrum of compound <b>1</b> .....                                                                                 | 4  |
| Figure S5. The <sup>13</sup> C NMR (100 MHz, DMSO- <i>d</i> <sub>6</sub> ) spectrum of compound <b>1</b> .....                                                                                | 5  |
| Figure S6. The DEPT135 spectrum of compound <b>1</b> .....                                                                                                                                    | 5  |
| Figure S7. The <sup>1</sup> H- <sup>1</sup> H COSY spectrum of compound <b>1</b> . ....                                                                                                       | 6  |
| Figure S8. The HMQC spectrum of compound <b>1</b> .....                                                                                                                                       | 6  |
| Figure S9. The HMBC spectrum of compound <b>1</b> . ....                                                                                                                                      | 7  |
| Figure S10. The HRESI-MS spectrum of compound <b>2</b> . ....                                                                                                                                 | 7  |
| Figure S11. The <sup>1</sup> H NMR (400 MHz, DMSO- <i>d</i> <sub>6</sub> ) spectrum of compound <b>2</b> .....                                                                                | 8  |
| Figure S12. The <sup>13</sup> C NMR (100 MHz, DMSO- <i>d</i> <sub>6</sub> ) spectrum of compound <b>2</b> .....                                                                               | 8  |
| Figure S13. The DEPT135 spectrum of compound <b>2</b> .....                                                                                                                                   | 9  |
| Figure S14. The <sup>1</sup> H- <sup>1</sup> H COSY spectrum of compound <b>2</b> . ....                                                                                                      | 9  |
| Figure S15. The HMQC spectrum of compound <b>2</b> .....                                                                                                                                      | 10 |
| Figure S16. The HMBC spectrum of compound <b>2</b> . ....                                                                                                                                     | 10 |

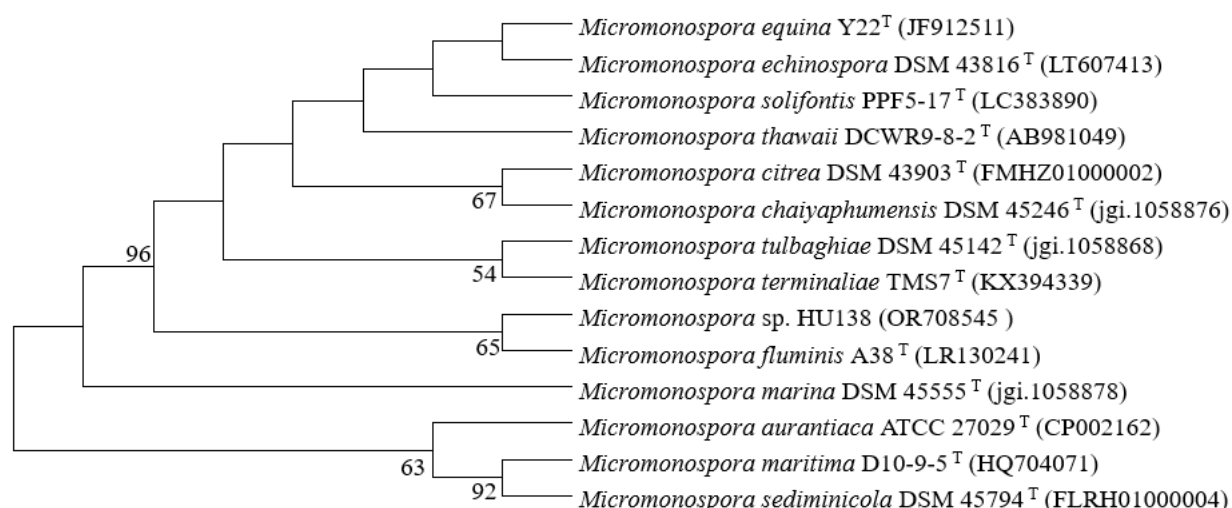

**Figure S1.** The maximum-parsimony tree shown the phylogenetic relationships between strain HU138 and related species of the genus *Micromonospora* based on 16S rRNA gene sequences.

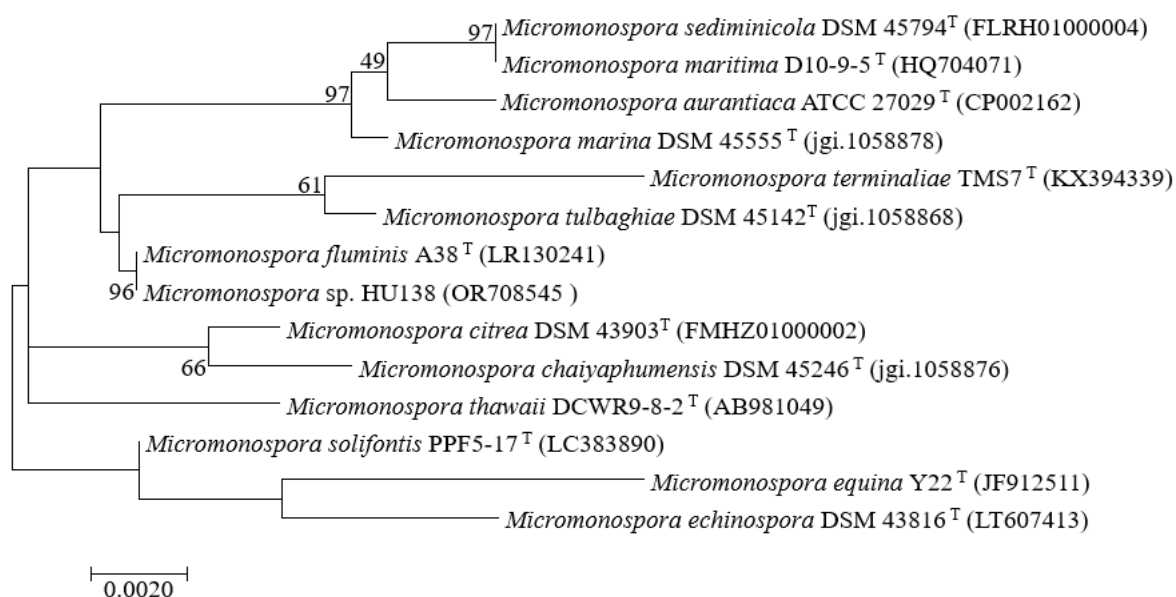

**Figure S2.** The maximum-likelihood tree shown the phylogenetic relationships between strain HU138 and related species of the genus *Micromonospora* based on 16S rRNA gene sequences.

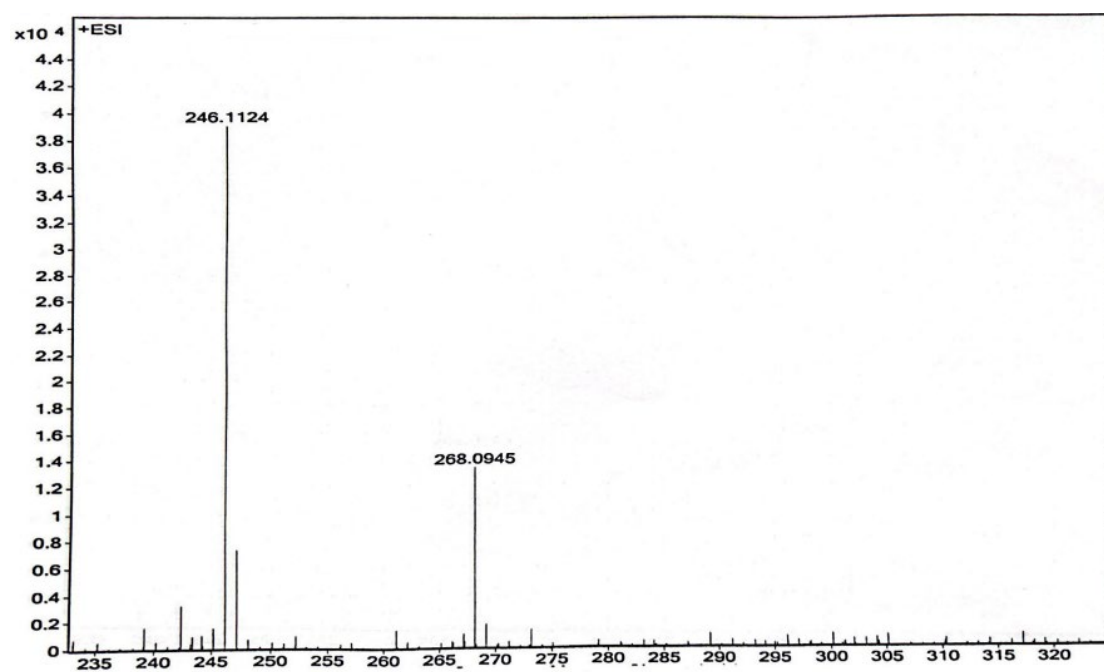

**Figure S3.** The HRESI-MS spectrum of compound 1.

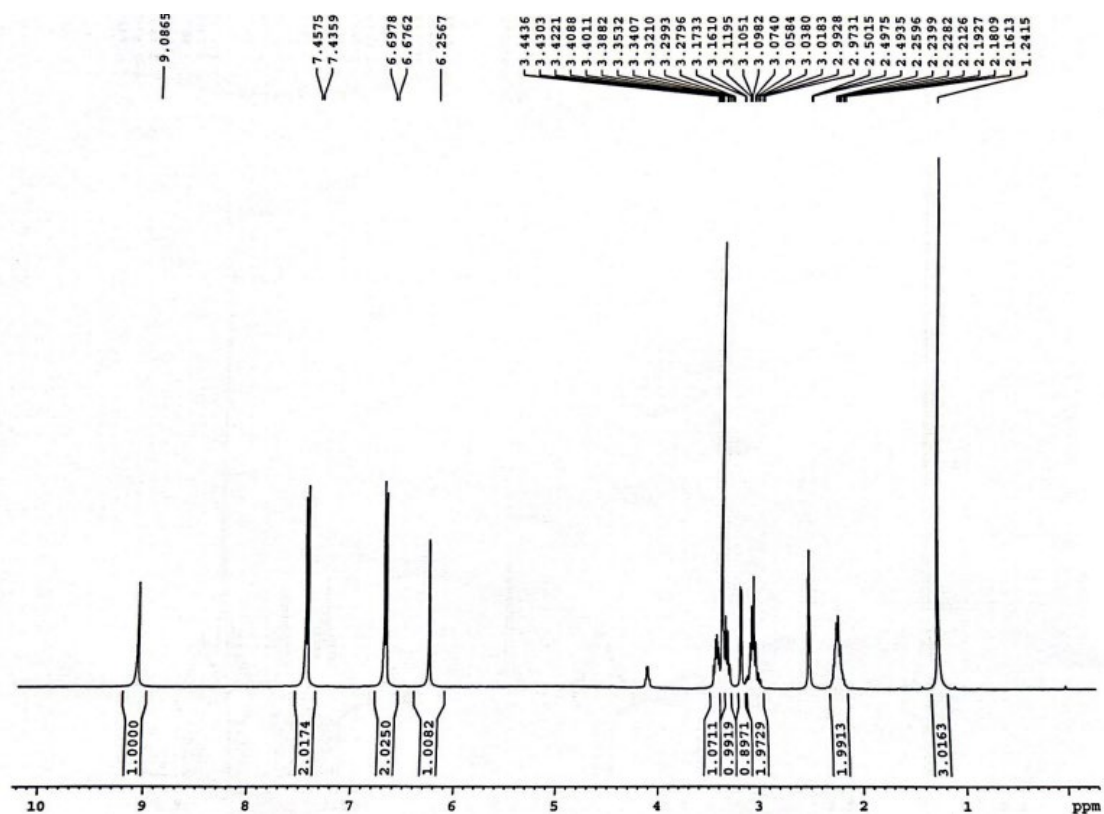

**Figure S4.** The <sup>1</sup>H NMR (400 MHz, DMSO-*d*<sub>6</sub>) spectrum of compound 1.

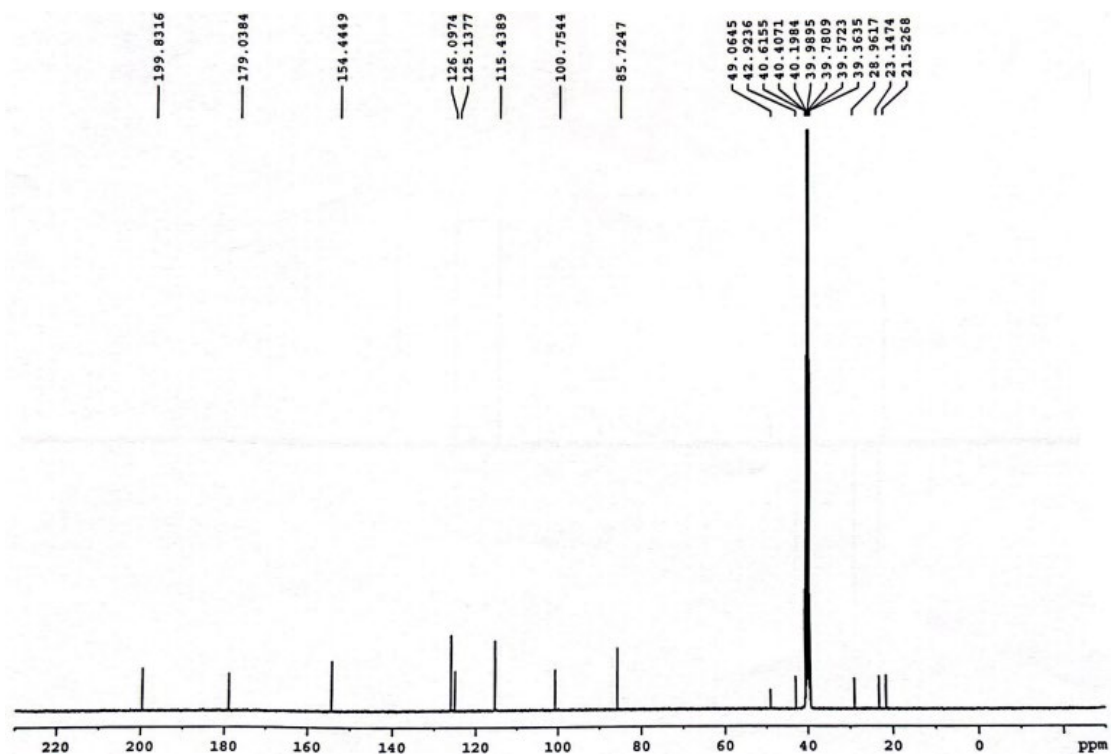

**Figure S5.** The  $^{13}\text{C}$  NMR (100 MHz,  $\text{DMSO-}d_6$ ) spectrum of compound **1**.

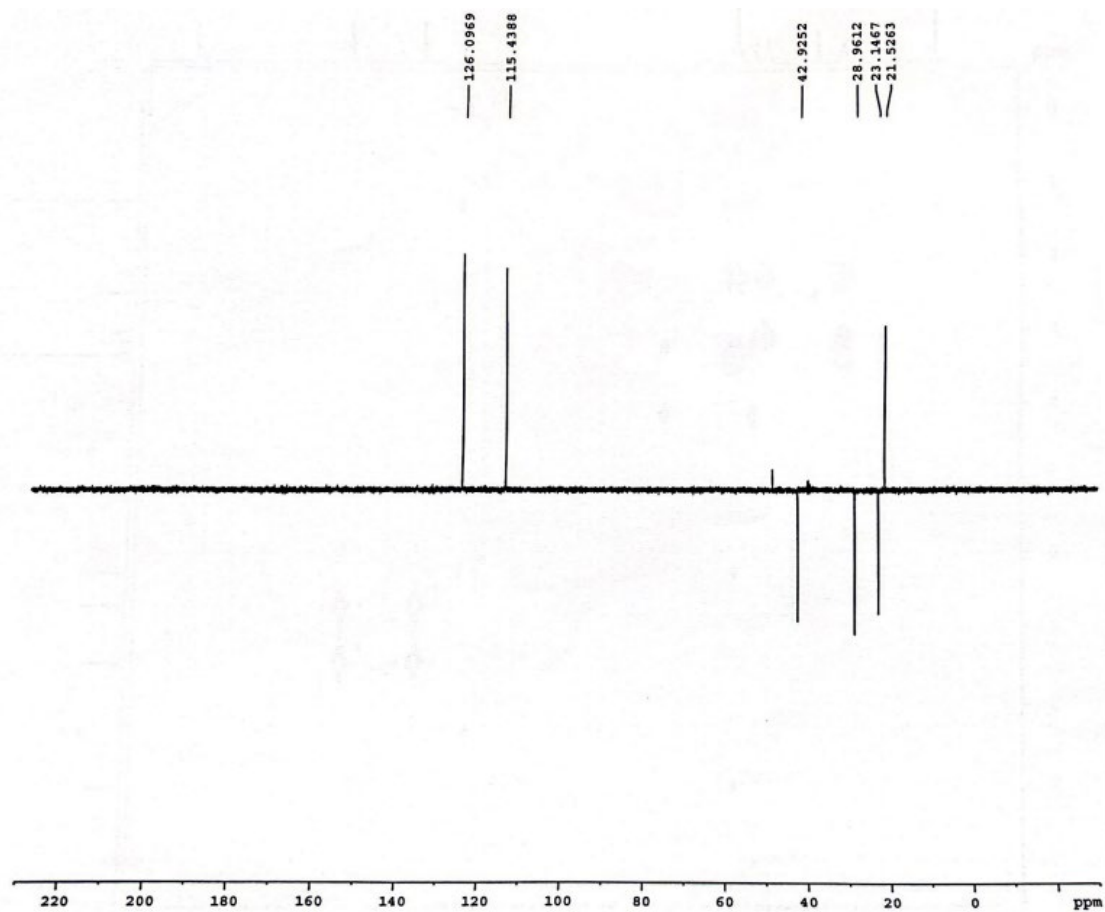

**Figure S6.** The DEPT135 spectrum of compound **1**.

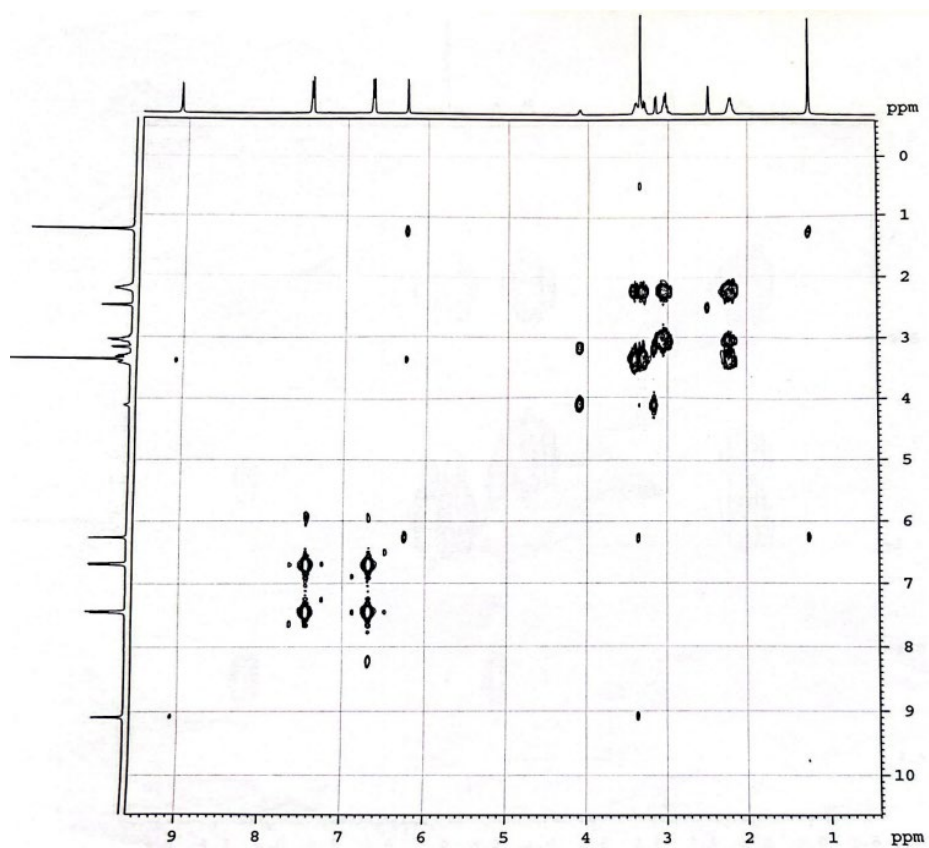

**Figure S7.** The  $^1\text{H}$ - $^1\text{H}$  COSY spectrum of compound **1**.

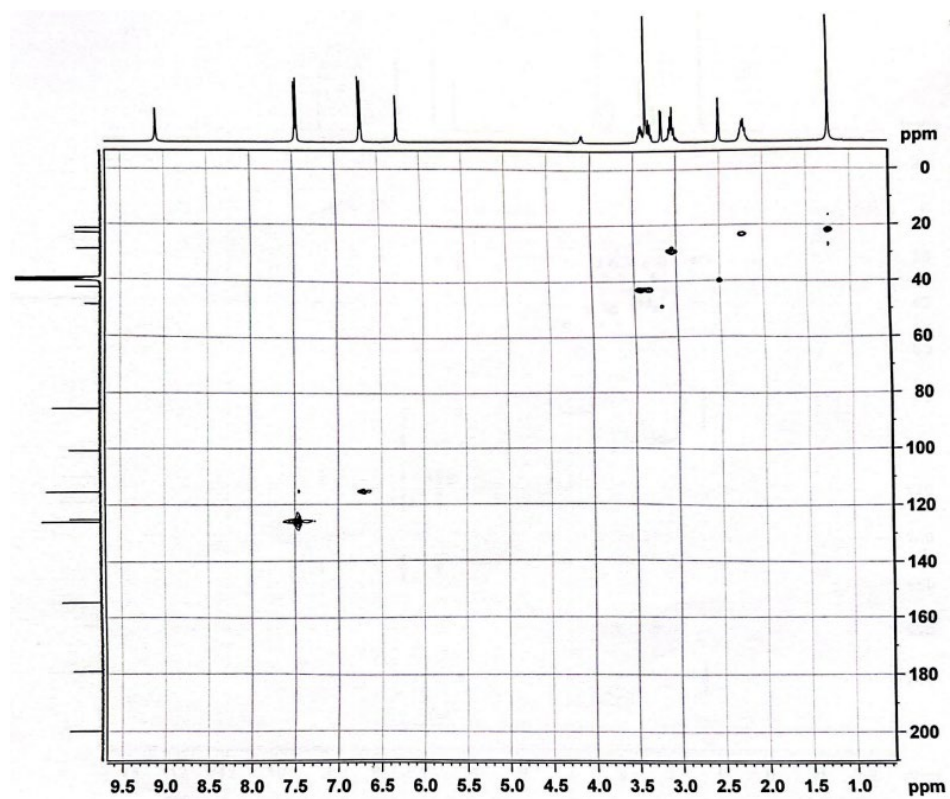

**Figure S8.** The HMQC spectrum of compound **1**.

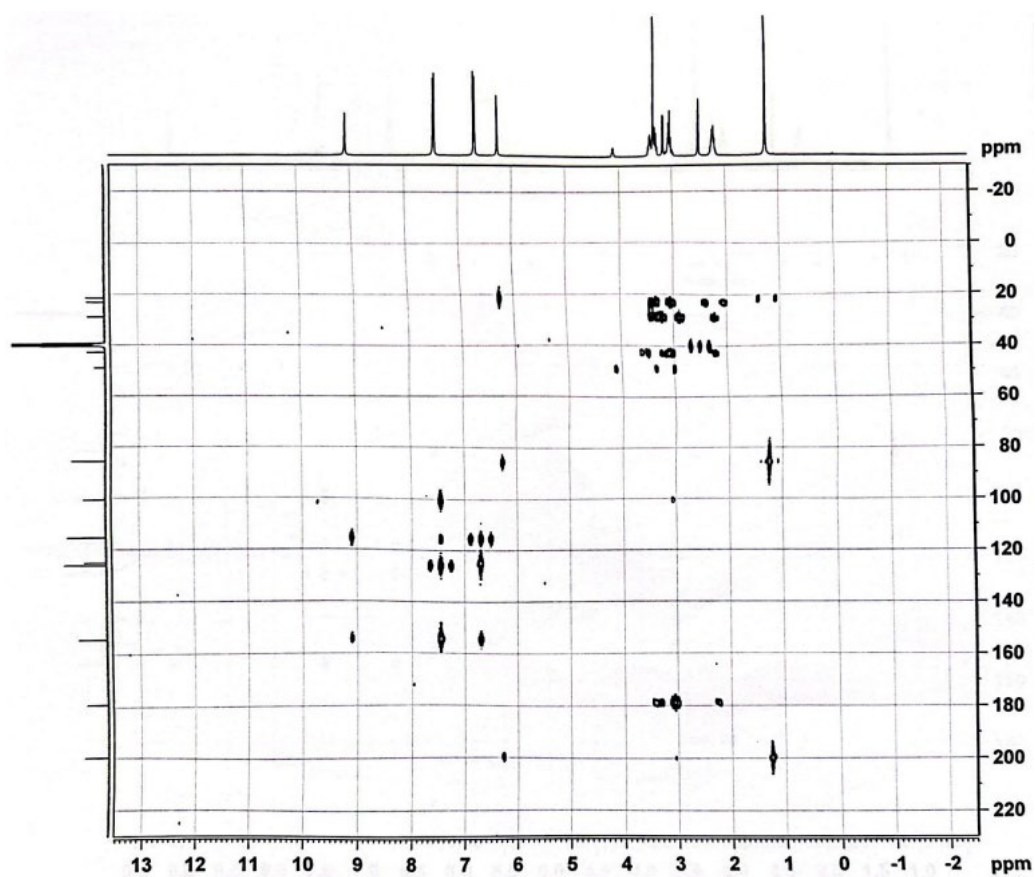

**Figure S9.** The HMBC spectrum of compound 1.

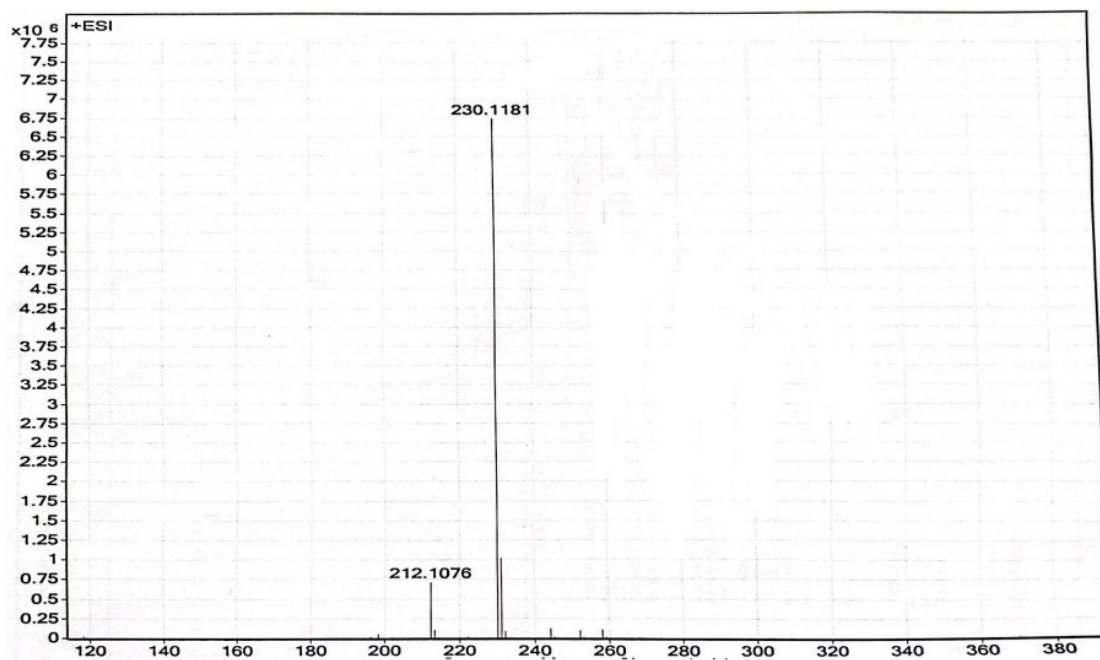

**Figure S10.** The HRESI-MS spectrum of compound 2.

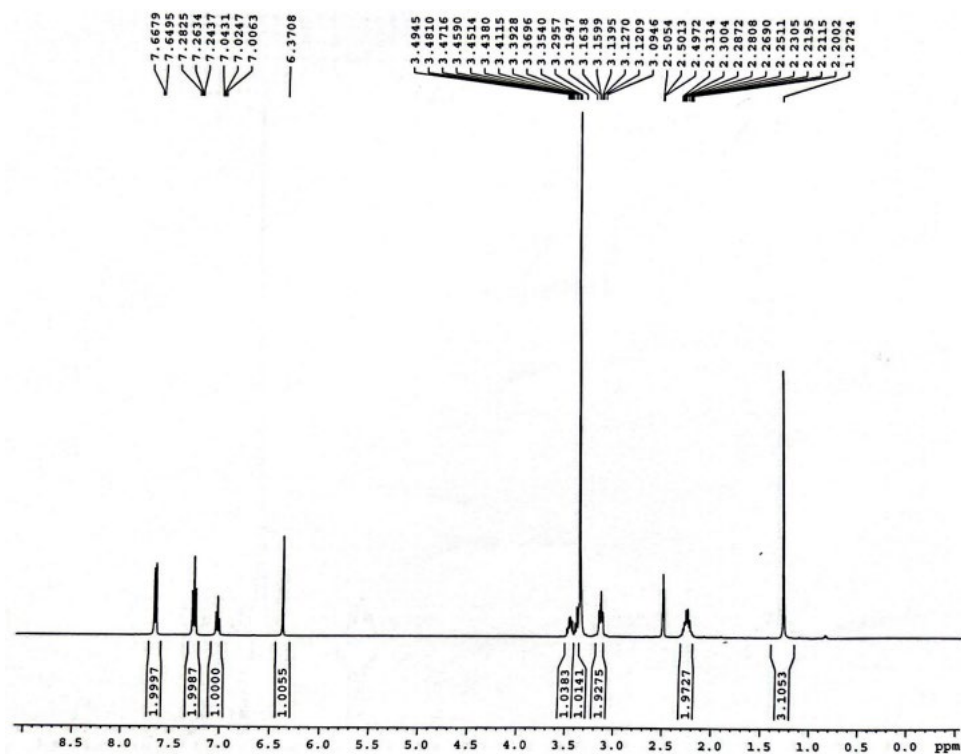

**Figure S11.** The <sup>1</sup>H NMR (400 MHz, DMSO-*d*<sub>6</sub>) spectrum of compound 2.

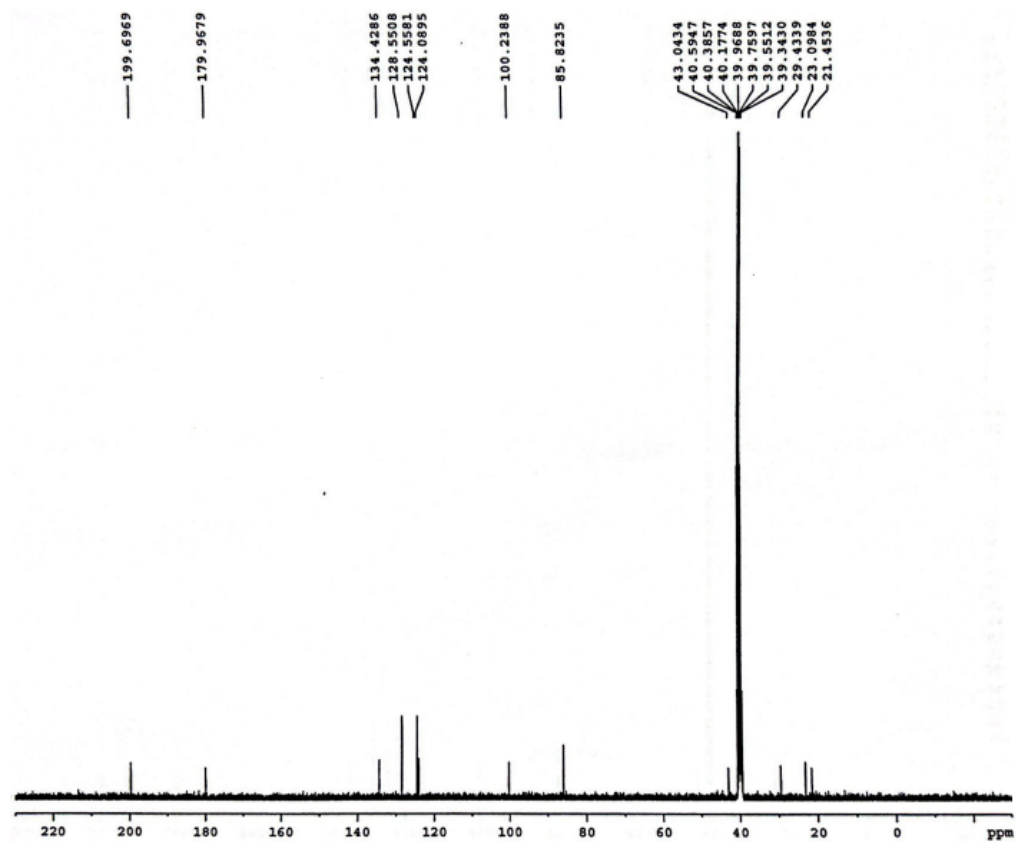

**Figure S12.** The <sup>13</sup>C NMR (100 MHz, DMSO-*d*<sub>6</sub>) spectrum of compound 2.



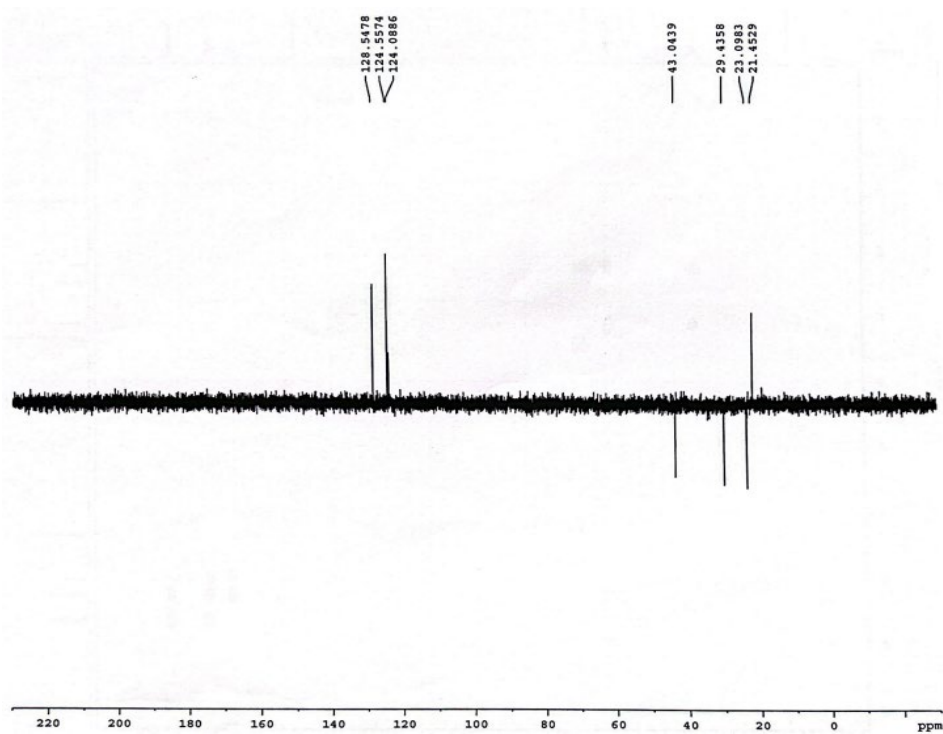

**Figure S13.** The DEPT135 spectrum of compound 2.

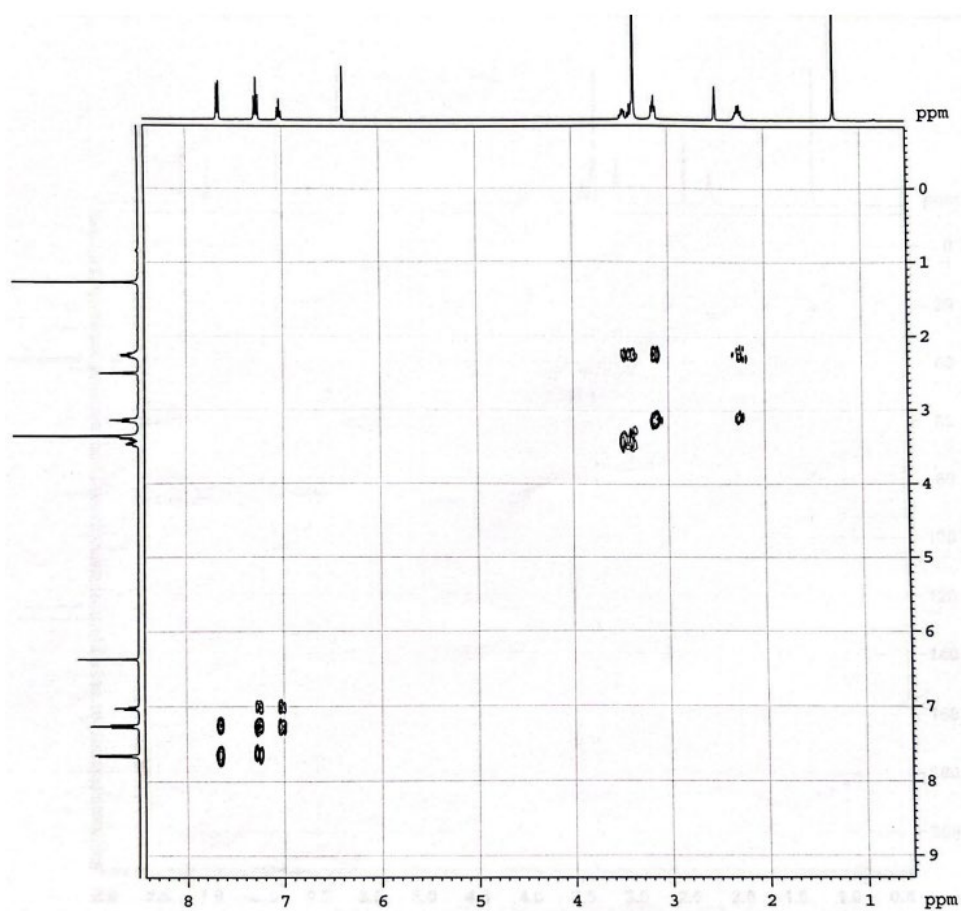

**Figure S14.** The  $^1\text{H}$ - $^1\text{H}$  COSY spectrum of compound 2.

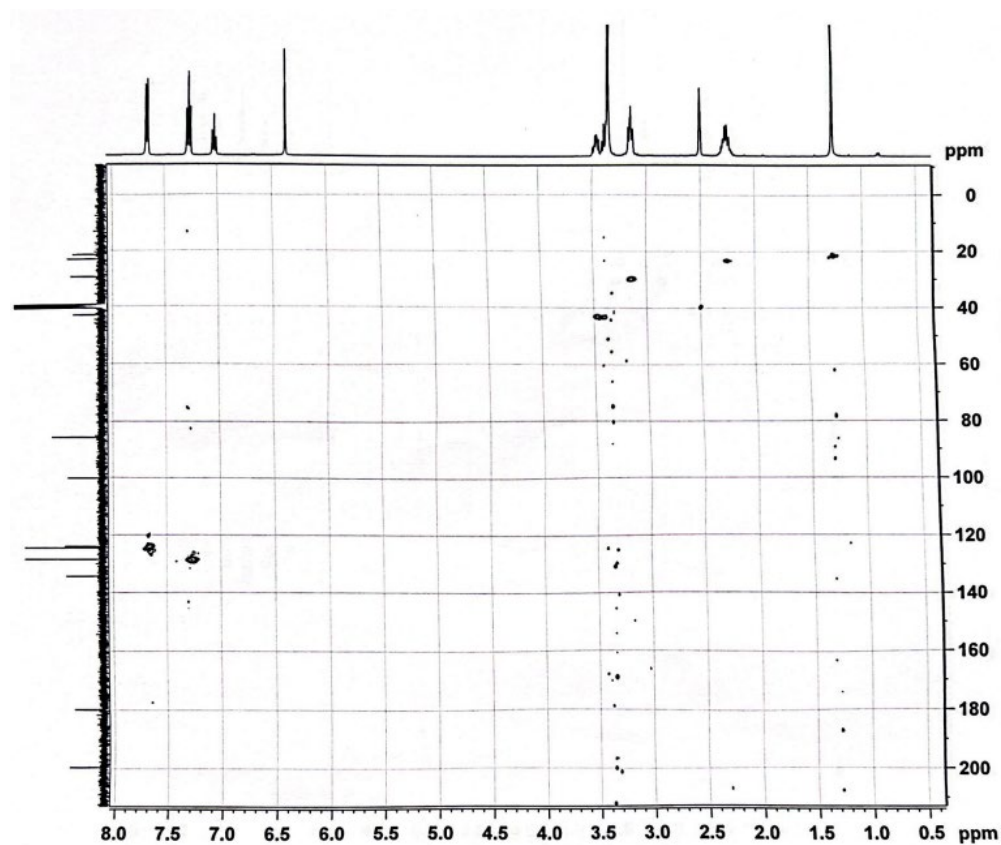

**Figure S15.** The HMQC spectrum of compound **2**.

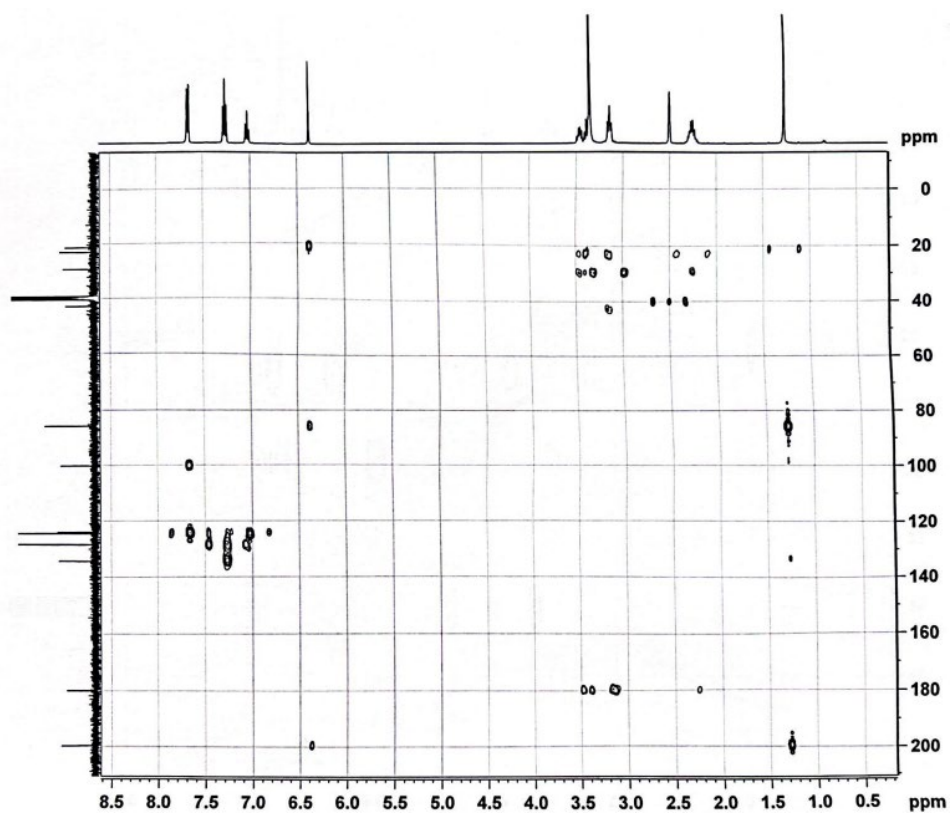

**Figure S16.** The HMBC spectrum of compound **2**.
